# Supplementary material for: Decoding of the ubiquitin code for clearance of colliding ribosomes by the RQT complex
Source: PubMed Central journal article supplement (PMC9831982; doi:10.1038/s41467-022-35608-4), 2023-01-10
Supplement: 41467_2022_35608_MOESM2_ESM.pdf [file 41467_2022_35608_MOESM2_ESM.pdf]

### **Description of Additional Supplementary Files**

**Supplementary Movie 1:** HS-AFM movie of Slh1 Class1 particle

**Supplementary Movie 2:** HS-AFM movie of Slh1 Class2 particle

**Supplementary Movie 3:** HS-AFM movie of Slh1 $\Delta$ N

**Supplementary Movie 4:** HS-AFM movie of Cue3

**Supplementary Movie 5:** HS-AFM movie of Rq4

**Supplementary Movie 6:** HS-AFM movie of Slh1/Cue3 complex

**Supplementary Movie 7:** HS-AFM movie of Slh1/Rqt4 complex

**Supplementary Movie 8:** HS-AFM movie of Slh1/Cue3/Rqt4 complex
